# Supplementary material for: Investigation of the electron transfer properties between metal centers in binuclear and trinuclear cyanido-bridged mixed valence complexes with cis/trans-configuration
Source: Royal Society of Chemistry journal article supplement (doi:10.1039/d2dt01313d), 2022-01-01
Supplement: d2dt01313d1.pdf [file d2dt01313d1.pdf]

*Supplementary Information for*

## **The investigation on electron transfer properties between metal centers in binuclear and trinuclear cyanido-bridged mixed valence complexes with cis/trans-configuration**

Qing-Dou Xu,<sup>a</sup> Chen Zeng,<sup>a, b</sup> Shao-Dong Su,<sup>a</sup> Yong He,<sup>a, b</sup> Yang Liu,<sup>a, b</sup> Sheng-Min Hu,<sup>a</sup> Xin-Tao Wu<sup>a</sup> and Tian-Lu Sheng\*<sup>a</sup>

<sup>a</sup> State Key Laboratory of Structural Chemistry, Fujian Institute of Research on the Structure of Matter, Chinese Academy of Sciences. Fuzhou, Fujian 350002, P.R. China

<sup>b</sup> School of Chemical Sciences, University of Chinese Academy of Sciences. Beijing, 100049, P.R. China

## Table of Contents

### 1. Crystallographic data

**Table S1:** Crystallographic data for *cis-1*[PF<sub>6</sub>]<sub>n</sub> (n = 1, 2)

**Table S2:** Crystallographic data for *cis-2*[PF<sub>6</sub>]<sub>n</sub> (n = 2, 4)

**Table S3:** Crystallographic data for *trans-2*[PF<sub>6</sub>]<sub>n</sub> (n = 2, 4)

### 2. UV-vis-NIR spectroscopy

**Fig. S1:** The UV-vis-NIR spectra of *cis-1*[PF<sub>6</sub>]<sub>2</sub> in different solvents at room temperature.

**Fig. S2:** The UV-vis-NIR spectra of *cis-2*[PF<sub>6</sub>]<sub>3</sub> in different solvents at room temperature.

**Fig. S3:** The UV-vis-NIR spectra of *cis-2*[PF<sub>6</sub>]<sub>4</sub> in different solvents at room temperature.

**Fig. S4:** The UV-vis-NIR spectra of *trans-2*[PF<sub>6</sub>]<sub>3</sub> in different solvents at room temperature.

**Fig. S5:** The UV-vis-NIR spectra of *trans-2*[PF<sub>6</sub>]<sub>4</sub> in different solvents at room temperature.

### 3. TDDFT calculations

**Fig. S6** Molecular orbital diagrams of *cis-1*[PF<sub>6</sub>]<sub>2</sub> (A), *cis-2*[PF<sub>6</sub>]<sub>3</sub> (B), *cis-2*[PF<sub>6</sub>]<sub>4</sub> (C), *trans-2*[PF<sub>6</sub>]<sub>3</sub> (D) and *trans-2*[PF<sub>6</sub>]<sub>4</sub> (E) in acetonitrile (isocontour value: 0.02 [e b<sup>-3</sup>]<sup>1/2</sup>).

**Fig. S7** The calculated C≡N stretching frequencies of *cis-1*[PF<sub>6</sub>]<sub>2</sub>, *cis-2*[PF<sub>6</sub>]<sub>3</sub>, *cis-2*[PF<sub>6</sub>]<sub>4</sub>, *trans-2*[PF<sub>6</sub>]<sub>3</sub> and *trans-2*[PF<sub>6</sub>]<sub>4</sub> in acetonitrile.

**Table S4** The experimental and calculated C≡N stretching frequencies of *cis-1*[PF<sub>6</sub>]<sub>2</sub>, *cis-2*[PF<sub>6</sub>]<sub>3</sub>, *cis-2*[PF<sub>6</sub>]<sub>4</sub>, *trans-2*[PF<sub>6</sub>]<sub>3</sub> and *trans-2*[PF<sub>6</sub>]<sub>4</sub>

**Table S1** Crystallographic data for *cis-1*[PF<sub>6</sub>]<sub>n</sub> (n = 1, 2)

| Complex                                       | <i>cis-1</i> [PF <sub>6</sub> ]                                                                    | <i>cis-1</i> [PF <sub>6</sub> ] <sub>2</sub>                                        |
|-----------------------------------------------|----------------------------------------------------------------------------------------------------|-------------------------------------------------------------------------------------|
| Empirical formula                             | C <sub>58</sub> H <sub>55</sub> Cl <sub>2</sub> F <sub>6</sub> FeN <sub>6</sub> OP <sub>3</sub> Ru | C <sub>61</sub> H <sub>63</sub> F <sub>12</sub> FeN <sub>6</sub> OP <sub>4</sub> Ru |
| Formula weight                                | 1286.81                                                                                            | 1404.97                                                                             |
| Crystal size (mm)                             | 0.209 × 0.201 × 0.102                                                                              | 0.384 × 0.367 × 0.346                                                               |
| Temperature/K                                 | 100(2)                                                                                             | 99.99(10)                                                                           |
| Crystal system                                | triclinic                                                                                          | monoclinic                                                                          |
| Space group                                   | P $\bar{1}$                                                                                        | P2 <sub>1</sub> /c                                                                  |
| a/Å                                           | 10.63212(19)                                                                                       | 9.86160(10)                                                                         |
| b/Å                                           | 12.3333(2)                                                                                         | 41.2452(3)                                                                          |
| c/Å                                           | 22.3815(3)                                                                                         | 15.29680(10)                                                                        |
| α/°                                           | 85.9555(13)                                                                                        | 90                                                                                  |
| β/°                                           | 79.6473(13)                                                                                        | 108.0130(10)                                                                        |
| γ/°                                           | 73.0909(16)                                                                                        | 90                                                                                  |
| Volume/Å <sup>3</sup>                         | 2761.75(9)                                                                                         | 5916.92(9)                                                                          |
| Z                                             | 2                                                                                                  | 4                                                                                   |
| ρ <sub>calcd</sub> /g cm <sup>-3</sup>        | 1.547                                                                                              | 1.577                                                                               |
| μ/mm <sup>-1</sup>                            | 4.463                                                                                              | 3.917                                                                               |
| F(000)                                        | 1312.0                                                                                             | 2868.0                                                                              |
| λ (Mo/Ga Kα, Å)                               | Ga, λ = 1.3405                                                                                     | Ga, λ = 1.3405                                                                      |
| 2θ range/°                                    | 6.514-120.894                                                                                      | 5.6-120.81                                                                          |
|                                               | -11 ≤ h ≤ 13                                                                                       | -12 ≤ h ≤ 12                                                                        |
| Index range                                   | -15 ≤ k ≤ 15                                                                                       | -45 ≤ k ≤ 53                                                                        |
|                                               | -28 ≤ l ≤ 28                                                                                       | -19 ≤ l ≤ 19                                                                        |
| Reflections collected                         | 39034                                                                                              | 75045                                                                               |
| Independent reflections                       | 12161 (R <sub>int</sub> = 0.0416, R <sub>sigma</sub> = 0.0406)                                     | 13076 (R <sub>int</sub> = 0.0633, R <sub>sigma</sub> = 0.0326)                      |
| Data/restraints/parameters                    | 12161/32/745                                                                                       | 13076/43/781                                                                        |
| Goodness-of-fit on F <sup>2</sup>             | 1.019                                                                                              | 1.066                                                                               |
| R <sub>1</sub> , wR <sub>2</sub> (I ≥ 2σ (I)) | R <sub>1</sub> = 0.0370, wR <sub>2</sub> = 0.0967                                                  | R <sub>1</sub> = 0.0437, wR <sub>2</sub> = 0.1097                                   |
| R <sub>1</sub> , wR <sub>2</sub> (all data)   | R <sub>1</sub> = 0.0443, wR <sub>2</sub> = 0.1005                                                  | R <sub>1</sub> = 0.0450, wR <sub>2</sub> = 0.1107                                   |

**Table S2** Crystallographic data for *cis-2*[PF<sub>6</sub>]<sub>n</sub> (n = 2, 4)

| Complex                                | <i>cis-2</i> [PF <sub>6</sub> ] <sub>2</sub>                                                                       | <i>cis-2</i> [PF <sub>6</sub> ] <sub>4</sub>                                                     |
|----------------------------------------|--------------------------------------------------------------------------------------------------------------------|--------------------------------------------------------------------------------------------------|
| Empirical formula                      | C <sub>88</sub> H <sub>82</sub> F <sub>12</sub> Fe <sub>2</sub> N <sub>6</sub> O <sub>1.32</sub> P <sub>6</sub> Ru | C <sub>90</sub> H <sub>85</sub> F <sub>24</sub> Fe <sub>2</sub> N <sub>7</sub> P <sub>8</sub> Ru |
| Formula weight                         | 1871.46                                                                                                            | 2181.17                                                                                          |
| Crystal size (mm)                      | 0.260 × 0.238 × 0.112                                                                                              | 0.367 × 0.356 × 0.348                                                                            |
| Temperature/K                          | 293.15                                                                                                             | 100.01(10)                                                                                       |
| Crystal system                         | triclinic                                                                                                          | orthorhombic                                                                                     |
| Space group                            | P $\bar{1}$                                                                                                        | Pbca                                                                                             |
| a/Å                                    | 11.874(4)                                                                                                          | 28.1279(6)                                                                                       |
| b/Å                                    | 15.236(5)                                                                                                          | 19.5282(4)                                                                                       |
| c/Å                                    | 31.642(12)                                                                                                         | 36.8338(7)                                                                                       |
| α/°                                    | 95.91(3)                                                                                                           | 90                                                                                               |
| β/°                                    | 99.87(2)                                                                                                           | 90                                                                                               |
| γ/°                                    | 108.389(17)                                                                                                        | 90                                                                                               |
| Volume/Å <sup>3</sup>                  | 5276(3)                                                                                                            | 20232.3(7)                                                                                       |
| Z                                      | 2                                                                                                                  | 8                                                                                                |
| ρ <sub>calcd</sub> /g cm <sup>-3</sup> | 1.178                                                                                                              | 1.432                                                                                            |
| μ/mm <sup>-1</sup>                     | 0.566                                                                                                              | 3.604                                                                                            |
| F(000)                                 | 1913.0                                                                                                             | 8848.0                                                                                           |
| λ (Mo/Ga Kα, Å)                        | Mo, λ = 0.71073                                                                                                    | Ga, λ = 1.3405                                                                                   |
| 2θ range/°                             | 3.652-49.426                                                                                                       | 4.172-96.268                                                                                     |
|                                        | -13 ≤ h ≤ 13                                                                                                       | -31 ≤ h ≤ 19                                                                                     |
| Index range                            | -17 ≤ k ≤ 17                                                                                                       | -21 ≤ k ≤ 21                                                                                     |
|                                        | -37 ≤ l ≤ 37                                                                                                       | -40 ≤ l ≤ 40                                                                                     |

|                                        |                                                                   |                                                                   |
|----------------------------------------|-------------------------------------------------------------------|-------------------------------------------------------------------|
| Reflections collected                  | 52540                                                             | 67536                                                             |
| Independent reflections                | 17179 ( $R_{\text{int}} = 0.0692$ , $R_{\text{sigma}} = 0.0535$ ) | 14530 ( $R_{\text{int}} = 0.0994$ , $R_{\text{sigma}} = 0.0893$ ) |
| Data/restraints/parameters             | 17179/171/1023                                                    | 14530/24/1194                                                     |
| Goodness-of-fit on $F^2$               | 0.918                                                             | 1.052                                                             |
| $R_1$ , $wR_2$ ( $I \geq 2\sigma(I)$ ) | $R_1 = 0.1114$ , $wR_2 = 0.2891$                                  | $R_1 = 0.0622$ , $wR_2 = 0.1531$                                  |
| $R_1$ , $wR_2$ (all data)              | $R_1 = 0.1235$ , $wR_2 = 0.3061$                                  | $R_1 = 0.0964$ , $wR_2 = 0.1715$                                  |

**Table S3** Crystallographic data for *trans*-2[PF<sub>6</sub>]<sub>n</sub> (n = 2, 4)

| Complex                                | <i>trans</i> -2[PF <sub>6</sub> ] <sub>2</sub>                                                   | <i>trans</i> -2[PF <sub>6</sub> ] <sub>4</sub>                                                   |
|----------------------------------------|--------------------------------------------------------------------------------------------------|--------------------------------------------------------------------------------------------------|
| Empirical formula                      | C <sub>88</sub> H <sub>82</sub> F <sub>12</sub> Fe <sub>2</sub> N <sub>6</sub> P <sub>6</sub> Ru | C <sub>92</sub> H <sub>88</sub> F <sub>24</sub> Fe <sub>2</sub> N <sub>8</sub> P <sub>8</sub> Ru |
| Formula weight                         | 1850.18                                                                                          | 2222.23                                                                                          |
| Crystal size (mm)                      | 0.296 × 0.287 × 0.281                                                                            | 0.397 × 0.112 × 0.107                                                                            |
| Temperature/K                          | 293(2)                                                                                           | 293(2)                                                                                           |
| Crystal system                         | monoclinic                                                                                       | triclinic                                                                                        |
| Space group                            | C2/c                                                                                             | Pī                                                                                               |
| a/Å                                    | 36.990(6)                                                                                        | 14.555(3)                                                                                        |
| b/Å                                    | 13.550(2)                                                                                        | 16.261(3)                                                                                        |
| c/Å                                    | 18.366(3)                                                                                        | 24.871(5)                                                                                        |
| α/°                                    | 90                                                                                               | 73.893(6)                                                                                        |
| β/°                                    | 91.345(2)                                                                                        | 85.450(7)                                                                                        |
| γ/°                                    | 90                                                                                               | 87.854(8)                                                                                        |
| Volume/Å <sup>3</sup>                  | 9203(2)                                                                                          | 5636.7(18)                                                                                       |
| Z                                      | 4                                                                                                | 2                                                                                                |
| ρ <sub>calcd</sub> /g cm <sup>-3</sup> | 1.335                                                                                            | 1.309                                                                                            |
| μ/mm <sup>-1</sup>                     | 0.647                                                                                            | 0.582                                                                                            |
| F(000)                                 | 3784.0                                                                                           | 2256.0                                                                                           |
| λ (Mo/Ga Kα, Å)                        | Mo, λ = 0.71073                                                                                  | Mo, λ = 0.71073                                                                                  |
| 2θ range/°                             | 6.18-54.97                                                                                       | 2.694-54.966                                                                                     |
|                                        | -48 ≤ h ≤ 48                                                                                     | -18 ≤ h ≤ 18                                                                                     |
| Index range                            | -17 ≤ k ≤ 17                                                                                     | -21 ≤ k ≤ 21                                                                                     |
|                                        | -23 ≤ l ≤ 23                                                                                     | -32 ≤ l ≤ 32                                                                                     |
| Reflections collected                  | 67530                                                                                            | 87619                                                                                            |
| Independent reflections                | 10364 ( $R_{\text{int}} = 0.0374$ , $R_{\text{sigma}} = 0.0214$ )                                | 25780 ( $R_{\text{int}} = 0.0483$ , $R_{\text{sigma}} = 0.0449$ )                                |
| Data/restraints/parameters             | 10364/31/522                                                                                     | 25780/8/1258                                                                                     |
| Goodness-of-fit on $F^2$               | 1.047                                                                                            | 1.063                                                                                            |
| $R_1$ , $wR_2$ ( $I \geq 2\sigma(I)$ ) | $R_1 = 0.0484$ , $wR_2 = 0.1317$                                                                 | $R_1 = 0.0625$ , $wR_2 = 0.1674$                                                                 |
| $R_1$ , $wR_2$ (all data)              | $R_1 = 0.0509$ , $wR_2 = 0.1355$                                                                 | $R_1 = 0.0737$ , $wR_2 = 0.1794$                                                                 |

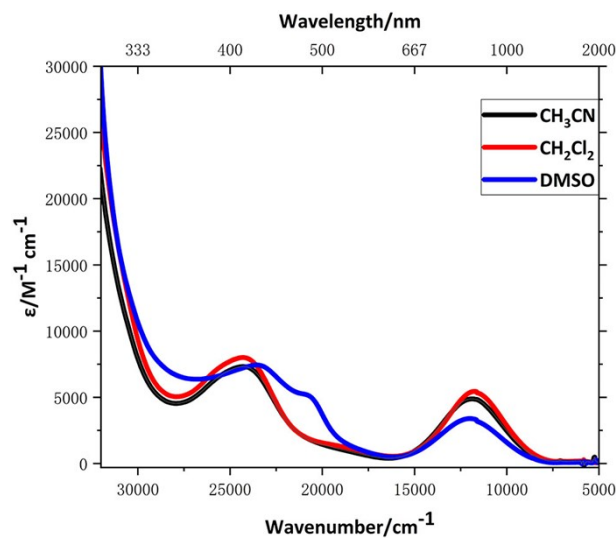

Fig. S1 The UV-vis-NIR spectra of *cis-1*[PF<sub>6</sub>]<sub>2</sub> in different solvents at room temperature.

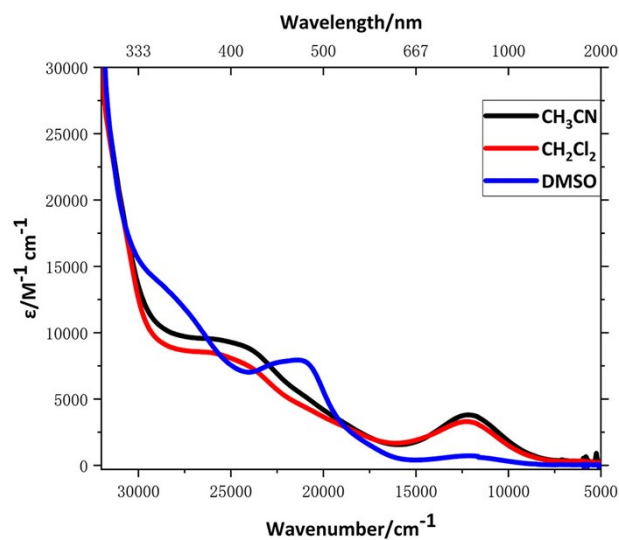

Fig. S2 The UV-vis-NIR spectra of *cis-2*[PF<sub>6</sub>]<sub>3</sub> in different solvents at room temperature.

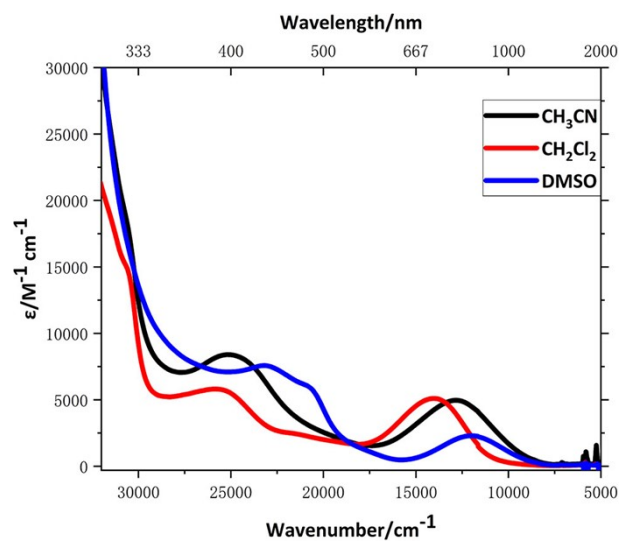

Fig. S3 The UV-vis-NIR spectra of *cis-2*[PF<sub>6</sub>]<sub>4</sub> in different solvents at room temperature.

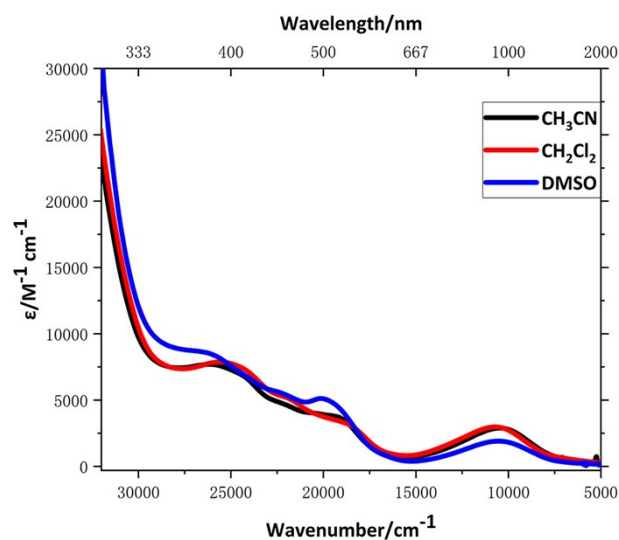

Fig. S4 The UV-vis-NIR spectra of  $trans-2[PF_6]_3$  in different solvents at room temperature.

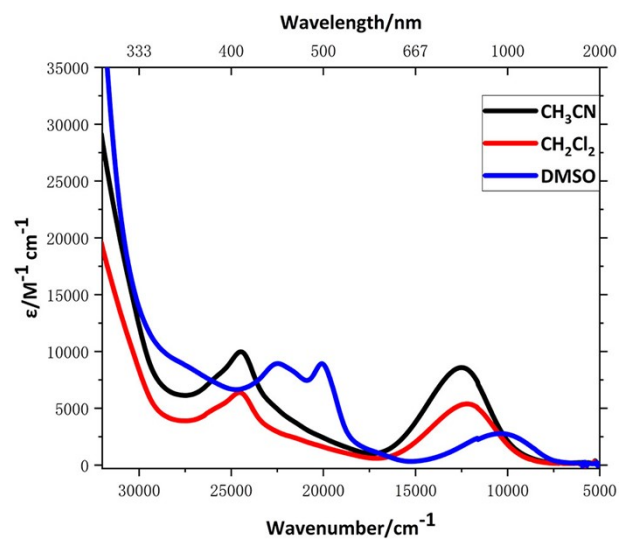

Fig. S5 The UV-vis-NIR spectra of  $trans-2[PF_6]_4$  in different solvents at room temperature.

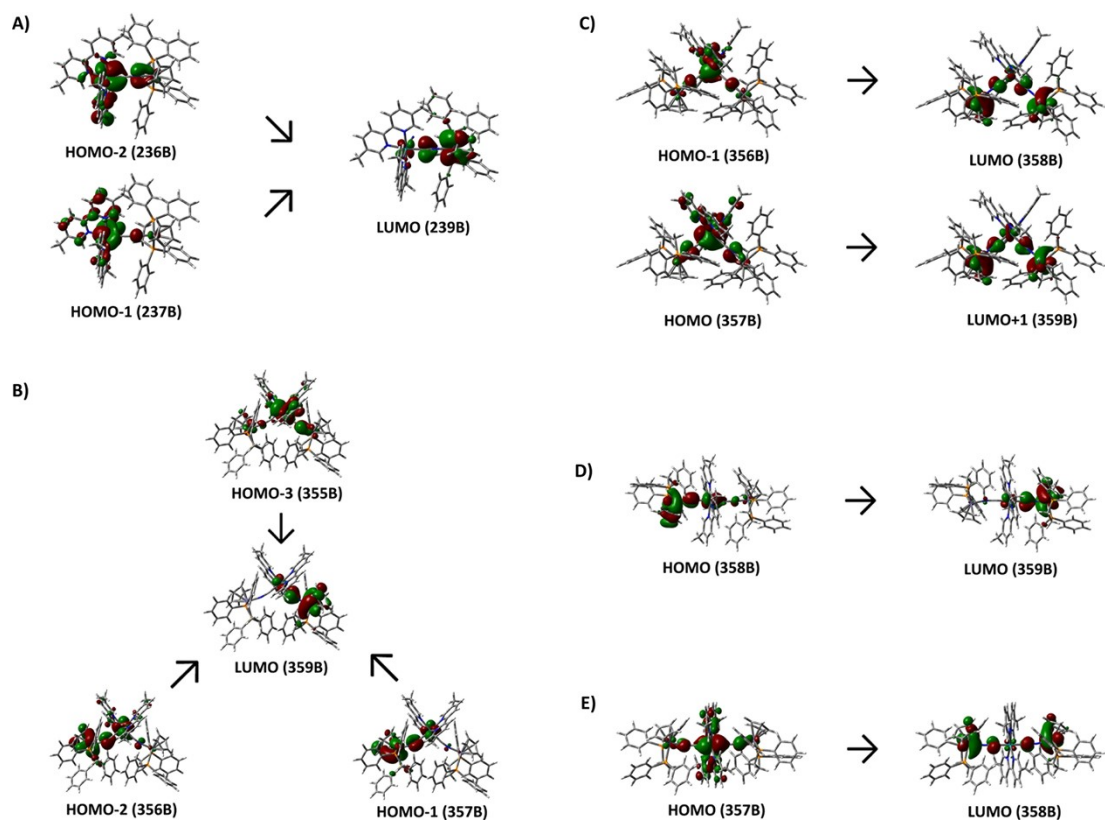

**Fig. S6** Molecular orbital diagrams of *cis*-1[PF<sub>6</sub>]<sub>2</sub> (A), *cis*-2[PF<sub>6</sub>]<sub>3</sub> (B), *cis*-2[PF<sub>6</sub>]<sub>4</sub> (C), *trans*-2[PF<sub>6</sub>]<sub>3</sub> (D) and *trans*-2[PF<sub>6</sub>]<sub>4</sub> (E) in acetonitrile (isocontour value: 0.02 [e b<sup>-3</sup>]<sup>1/2</sup>).

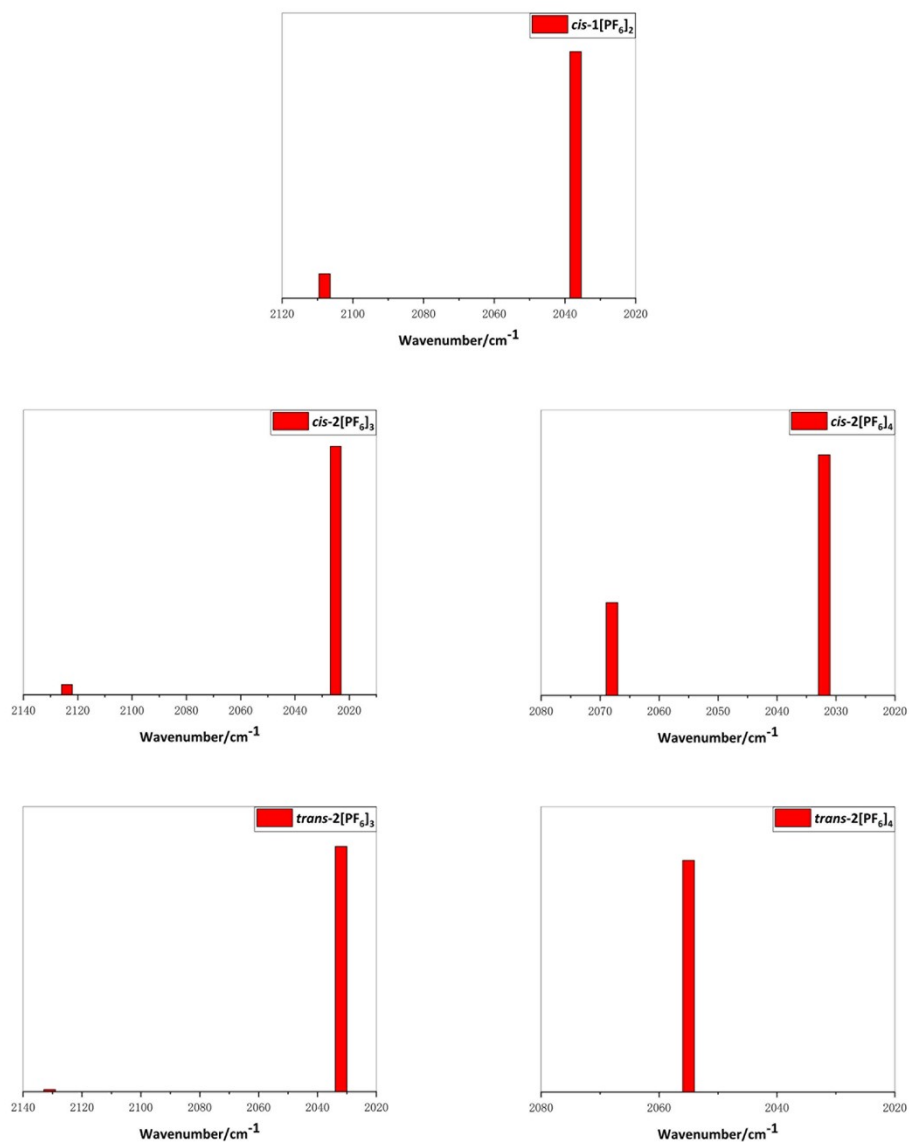

Fig. S7 The calculated C≡N stretching frequencies of *cis-1*[PF<sub>6</sub>]<sub>2</sub>, *cis-2*[PF<sub>6</sub>]<sub>3</sub>, *cis-2*[PF<sub>6</sub>]<sub>4</sub>, *trans-2*[PF<sub>6</sub>]<sub>3</sub> and *trans-2*[PF<sub>6</sub>]<sub>4</sub> in acetonitrile.

Table S4 The experimental and calculated C≡N stretching frequencies of *cis-1*[PF<sub>6</sub>]<sub>2</sub>, *cis-2*[PF<sub>6</sub>]<sub>3</sub>, *cis-2*[PF<sub>6</sub>]<sub>4</sub>, *trans-2*[PF<sub>6</sub>]<sub>3</sub> and *trans-2*[PF<sub>6</sub>]<sub>4</sub>

| Complex                                        | $\nu_{\text{C}\equiv\text{N}}/\text{cm}^{-1}$ (exp) | $\nu_{\text{C}\equiv\text{N}}/\text{cm}^{-1}$ (calc) |
|------------------------------------------------|-----------------------------------------------------|------------------------------------------------------|
| <i>cis-1</i> [PF <sub>6</sub> ] <sub>2</sub>   | 2077, 2100                                          | 2108, 2037                                           |
| <i>cis-2</i> [PF <sub>6</sub> ] <sub>3</sub>   | 2087, 2105                                          | 2124, 2025                                           |
| <i>cis-2</i> [PF <sub>6</sub> ] <sub>4</sub>   | 2056, 2018                                          | 2068, 2032                                           |
| <i>trans-2</i> [PF <sub>6</sub> ] <sub>3</sub> | 2098, 2037                                          | 2131, 2032                                           |
| <i>trans-2</i> [PF <sub>6</sub> ] <sub>4</sub> | 2040                                                | 2055                                                 |

#### Optimized Cartesian Coordinates of *cis-1*<sup>2+</sup>

| Atomic Name | X        | Y        | Z         |
|-------------|----------|----------|-----------|
| Ru          | -2.48727 | 0.093405 | -0.282929 |
| Fe          | 2.293211 | 0.220273 | 1.364518  |



|   |           |           |           |
|---|-----------|-----------|-----------|
| P | 2.8756    | 1.512523  | -0.550583 |
| P | 2.779684  | -1.59144  | -0.070476 |
| N | -2.452509 | -1.974928 | -0.669901 |
| N | -4.352537 | 0.384124  | -1.293701 |
| N | -2.912419 | 2.104011  | 0.155971  |
| N | -3.508576 | -0.700679 | 1.433306  |
| N | 0.466617  | 0.139183  | 0.859894  |
| N | -0.799364 | 0.788198  | -2.912774 |
| C | -0.681737 | 0.083695  | 0.515786  |
| C | -4.85937  | 1.653901  | -1.203557 |
| C | -1.909971 | -2.54815  | -1.780954 |
| H | -1.430935 | -1.867098 | -2.474918 |
| C | -3.102514 | -2.764293 | 0.249697  |
| C | 2.44038   | 0.453553  | -2.086713 |
| H | 1.584986  | 0.897876  | -2.605187 |
| H | 3.311889  | 0.511996  | -2.745415 |
| C | -4.085021 | 2.592346  | -0.371814 |
| C | 4.561751  | -2.087124 | -0.360127 |
| C | -4.00743  | 0.019307  | 2.471628  |
| H | -3.847562 | 1.090749  | 2.430284  |
| C | 1.85444   | 5.477018  | 0.104355  |
| H | 2.244976  | 6.288405  | 0.712816  |
| C | -4.999098 | -0.539716 | -2.04999  |
| H | -4.54852  | -1.523341 | -2.09807  |
| C | 1.94173   | -3.211925 | 0.364519  |
| C | 2.448412  | 4.206354  | 0.174195  |
| H | 3.30736   | 4.061165  | 0.825145  |
| C | 2.080492  | -1.009919 | -1.736224 |
| H | 2.408857  | -1.693244 | -2.527395 |
| H | 0.996375  | -1.102926 | -1.641948 |
| C | 4.670593  | 2.014917  | -0.824177 |
| C | 5.21174   | -1.848764 | -1.588827 |
| H | 4.700429  | -1.353816 | -2.408847 |
| C | 1.969297  | 3.148793  | -0.636457 |
| C | 0.876348  | 3.368507  | -1.498688 |
| H | 0.468251  | 2.579095  | -2.121677 |
| C | -2.153062 | 2.915711  | 0.944882  |
| H | -1.231516 | 2.486219  | 1.317139  |
| C | 2.360625  | -4.406262 | -0.2647   |
| H | 3.163268  | -4.393782 | -0.99724  |
| C | 0.91681   | -3.253724 | 1.333061  |
| H | 0.582589  | -2.340657 | 1.814939  |
| C | 3.697378  | 1.378996  | 2.666616  |
| H | 4.372454  | 2.150166  | 2.323804  |

|   |           |           |           |
|---|-----------|-----------|-----------|
| C | -3.673154 | -2.062505 | 1.417007  |
| C | 5.731892  | 1.350801  | -0.176389 |
| H | 5.535637  | 0.538151  | 0.51355   |
| C | -6.182181 | -0.269112 | -2.761423 |
| C | -4.494651 | 3.9123    | -0.098906 |
| H | -5.41912  | 4.293598  | -0.516064 |
| C | -4.699882 | -0.555021 | 3.553609  |
| C | -1.501028 | 0.578531  | -1.970437 |
| C | -3.20932  | -4.153394 | 0.04179   |
| H | -3.733284 | -4.775116 | 0.758451  |
| C | 3.996415  | -0.024995 | 2.731779  |
| H | 4.94273   | -0.484134 | 2.486953  |
| C | -2.509536 | 4.235695  | 1.269897  |
| C | 5.261707  | -2.742432 | 0.679984  |
| H | 4.766461  | -2.970098 | 1.621641  |
| C | -1.977518 | -3.927574 | -2.047511 |
| C | 2.350393  | 1.570139  | 3.124877  |
| H | 1.829457  | 2.515604  | 3.184459  |
| C | 1.828625  | 0.285957  | 3.512582  |
| H | 0.833604  | 0.097089  | 3.890501  |
| C | 0.324462  | -4.482866 | 1.676951  |
| H | -0.451772 | -4.511818 | 2.437469  |
| C | -4.354108 | -2.709523 | 2.468024  |
| H | -4.488935 | -3.784921 | 2.456853  |
| C | -3.714129 | 4.732585  | 0.722168  |
| H | -4.034943 | 5.748082  | 0.938679  |
| C | -6.852627 | -1.333392 | -3.599881 |
| H | -6.869085 | -1.045146 | -4.658809 |
| H | -7.894246 | -1.48458  | -3.289854 |
| H | -6.33494  | -2.295289 | -3.523545 |
| C | 2.840493  | -0.703527 | 3.270549  |
| H | 2.765035  | -1.759271 | 3.489482  |
| C | -2.649744 | -4.734853 | -1.101793 |
| H | -2.738517 | -5.805693 | -1.265031 |
| C | 0.775585  | 5.703464  | -0.775187 |
| H | 0.334496  | 6.694047  | -0.852123 |
| C | -6.702327 | 1.041361  | -2.663563 |
| H | -7.611287 | 1.307341  | -3.196471 |
| C | 0.74471   | -5.67279  | 1.053303  |
| H | 0.298188  | -6.623665 | 1.332069  |
| C | 0.289126  | 4.648343  | -1.56738  |
| H | -0.536681 | 4.813371  | -2.254021 |
| C | -4.866796 | -1.959095 | 3.532895  |
| H | -5.39589  | -2.455928 | 4.341846  |

|   |           |           |           |
|---|-----------|-----------|-----------|
| C | 6.545737  | -2.259252 | -1.775472 |
| H | 7.035348  | -2.075649 | -2.727702 |
| C | 1.759189  | -5.631105 | 0.076992  |
| H | 2.093746  | -6.546921 | -0.402711 |
| C | -1.63741  | 5.082374  | 2.168911  |
| H | -2.185801 | 5.403457  | 3.063851  |
| H | -1.302642 | 5.98886   | 1.650119  |
| H | -0.744707 | 4.537769  | 2.493771  |
| C | 7.064697  | 1.72041   | -0.437424 |
| H | 7.875351  | 1.203429  | 0.068831  |
| C | -6.041607 | 1.99983   | -1.886907 |
| H | -6.439444 | 3.005823  | -1.824285 |
| C | 6.593629  | -3.149103 | 0.491964  |
| H | 7.119775  | -3.661537 | 1.292723  |
| C | 7.347007  | 2.75121   | -1.352395 |
| H | 8.375756  | 3.038252  | -1.55177  |
| C | -1.356721 | -4.507923 | -3.298169 |
| H | -0.977354 | -3.723981 | -3.961447 |
| H | -2.084435 | -5.10362  | -3.863045 |
| H | -0.520346 | -5.173763 | -3.047263 |
| C | -5.244684 | 0.29729   | 4.677513  |
| H | -4.851231 | -0.0279   | 5.648883  |
| H | -6.338411 | 0.223268  | 4.732439  |
| H | -4.987741 | 1.353626  | 4.546145  |
| C | 4.956706  | 3.048175  | -1.747401 |
| H | 4.153997  | 3.577482  | -2.253543 |
| C | 7.240266  | -2.906263 | -0.737271 |
| H | 8.268044  | -3.22604  | -0.88474  |
| C | 6.289821  | 3.410753  | -2.009593 |
| H | 6.499925  | 4.206169  | -2.719215 |

Optimized Cartesian Coordinates of cis-2<sup>3+</sup>

| Atomic Name | X         | Y         | Z         |
|-------------|-----------|-----------|-----------|
| Ru          | -0.047917 | 2.372604  | 0.002202  |
| Fe          | -4.058878 | -0.40476  | -1.216558 |
| Fe          | 4.144172  | -0.171149 | 1.126181  |
| P           | -3.270923 | -2.623234 | -1.136158 |
| P           | -5.070959 | -0.929766 | 0.845545  |
| P           | 4.902738  | -0.814769 | -1.008281 |
| P           | 3.539543  | -2.440947 | 1.339189  |
| N           | 2.45049   | 0.426308  | 0.427594  |
| N           | -2.451935 | 0.312978  | -0.430982 |
| C           | -1.506465 | 1.004832  | -0.196071 |
| C           | 1.464389  | 1.065564  | 0.210878  |

|   |           |           |           |
|---|-----------|-----------|-----------|
| N | -0.036675 | 2.512583  | -2.103791 |
| N | -1.500885 | 3.907807  | -0.353543 |
| N | 1.349314  | 3.964217  | 0.333179  |
| C | -1.299028 | -4.380265 | -2.251846 |
| H | -1.912421 | -5.192024 | -1.870912 |
| N | -0.061732 | 2.540294  | 2.105503  |
| C | -0.208921 | 2.811081  | -4.88632  |
| H | -0.281481 | 2.935027  | -5.963472 |
| C | 4.925179  | -0.182024 | 3.185861  |
| H | 4.78213   | -0.989912 | 3.88941   |
| C | -1.681507 | -3.035381 | -2.050261 |
| C | 0.699828  | 1.876574  | -4.339296 |
| C | -4.48293  | -0.465954 | -3.367217 |
| H | -4.079273 | -1.190301 | -4.060644 |
| C | 0.741722  | 1.767135  | -2.936308 |
| H | 1.418155  | 1.073295  | -2.453745 |
| C | -1.706128 | 4.210632  | -1.674577 |
| C | -3.892766 | 0.798291  | -3.056545 |
| H | -2.959993 | 1.175138  | -3.450945 |
| C | 1.986681  | 4.671578  | -0.636007 |
| H | 1.792611  | 4.364892  | -1.657149 |
| C | -3.067102 | 5.646927  | 0.319932  |
| C | -1.011797 | 3.582866  | -4.038198 |
| H | -1.702402 | 4.302074  | -4.462706 |
| C | 4.941141  | 0.480035  | -2.370713 |
| C | -2.163726 | 4.605493  | 0.605287  |
| H | -1.958677 | 4.321054  | 1.630682  |
| C | -0.914363 | 3.426125  | -2.641873 |
| C | 1.426113  | -4.184594 | 2.141429  |
| H | 1.99938   | -4.972409 | 1.658112  |
| C | 0.242328  | -4.51851  | 2.822187  |
| H | -0.091065 | -5.552502 | 2.84758   |
| C | -0.485627 | -3.520636 | 3.501073  |
| H | -1.381406 | -3.786076 | 4.057345  |
| C | -0.033957 | -2.188342 | 3.478558  |
| H | -0.586347 | -1.419357 | 4.011075  |
| C | 1.148764  | -1.850185 | 2.792098  |
| H | 1.496072  | -0.82171  | 2.777999  |
| C | 1.888629  | -2.848648 | 2.129505  |
| C | -5.710469 | -0.588673 | -2.613238 |
| H | -6.412077 | -1.408525 | -2.652909 |
| C | -3.285781 | 5.947742  | -1.044759 |
| H | -3.973473 | 6.741849  | -1.323277 |
| C | 1.54292   | 4.293604  | 1.649611  |

|   |           |           |           |
|---|-----------|-----------|-----------|
| C | 4.07327   | 0.958257  | 3.021069  |
| H | 3.176607  | 1.169665  | 3.586586  |
| C | -5.888448 | 0.633134  | -1.875007 |
| H | -6.727821 | 0.859214  | -1.232482 |
| C | 0.784576  | 3.491145  | 2.628976  |
| C | 4.649512  | 1.793977  | 1.99463   |
| H | 4.249343  | 2.733284  | 1.640444  |
| C | 2.403781  | 5.354278  | 1.997697  |
| H | 2.557442  | 5.622495  | 3.036404  |
| C | 0.642847  | -3.646316 | -3.53158  |
| H | 1.521012  | -3.884611 | -4.12674  |
| C | -2.607709 | 5.23128   | -2.03832  |
| H | -2.772513 | 5.476778  | -3.080948 |
| C | -4.190055 | -2.487814 | 1.540165  |
| H | -3.921414 | -2.292739 | 2.583323  |
| H | -4.916651 | -3.305736 | 1.531861  |
| C | -5.00115  | 0.343148  | 2.221956  |
| C | -0.760189 | 1.901015  | 4.351255  |
| C | -0.893705 | -1.997613 | -2.590174 |
| H | -1.186588 | -0.962988 | -2.441841 |
| C | -4.760296 | 1.480508  | -2.125147 |
| H | -4.601633 | 2.466675  | -1.711753 |
| C | -5.392319 | -0.012233 | 3.534003  |
| H | -5.688608 | -1.032854 | 3.765599  |
| C | 5.152383  | 2.472962  | -4.361829 |
| H | 5.257927  | 3.244161  | -5.120348 |
| C | 3.519321  | 6.520874  | -1.481772 |
| H | 4.612468  | 6.4434    | -1.419195 |
| H | 3.272449  | 7.588239  | -1.423786 |
| H | 3.2084    | 6.162067  | -2.468687 |
| C | 6.005281  | -0.083276 | 2.240091  |
| H | 6.826912  | -0.777824 | 2.146301  |
| C | 4.511823  | 1.79683   | -2.103481 |
| H | 4.113819  | 2.046844  | -1.124456 |
| C | -0.807985 | 1.775085  | 2.94976   |
| H | -1.46035  | 1.050924  | 2.478047  |
| C | 5.475149  | 0.164677  | -3.641017 |
| H | 5.849511  | -0.833903 | -3.850897 |
| C | 0.263844  | -2.305794 | -3.329347 |
| H | 0.854496  | -1.504633 | -3.765936 |
| C | 5.574414  | 1.156312  | -4.633746 |
| H | 6.001393  | 0.909393  | -5.601885 |
| C | 4.620712  | 2.788628  | -3.097575 |
| H | 4.316353  | 3.809079  | -2.879308 |

|   |            |           |           |
|---|------------|-----------|-----------|
| C | -0.138033  | -4.683669 | -2.985992 |
| H | 0.139214   | -5.721289 | -3.150949 |
| C | 2.85071    | 5.749925  | -0.366514 |
| C | -5.456975  | 0.963721  | 4.544401  |
| H | -5.779921  | 0.6851    | 5.543782  |
| C | 1.588033   | 1.026727  | -5.218702 |
| H | 0.99864    | 0.281918  | -5.770415 |
| H | 2.352096   | 0.501661  | -4.637023 |
| H | 2.104899   | 1.641238  | -5.964893 |
| C | -7.874948  | -0.459158 | 1.241946  |
| H | -7.584001  | 0.492817  | 1.676754  |
| C | -6.900332  | -1.377094 | 0.790687  |
| C | -7.313955  | -2.608875 | 0.236452  |
| H | -6.591455  | -3.328586 | -0.136845 |
| C | -8.682577  | -2.924916 | 0.155077  |
| H | -8.988889  | -3.879647 | -0.26358  |
| C | -9.651456  | -2.011247 | 0.612095  |
| H | -10.707619 | -2.257614 | 0.549671  |
| C | -9.243259  | -0.777532 | 1.152563  |
| H | -9.984242  | -0.067445 | 1.509388  |
| C | 5.841793   | 1.160621  | 1.522883  |
| H | 6.509566   | 1.562385  | 0.773862  |
| C | 5.370115   | -4.679874 | 4.364844  |
| H | 5.131479   | -4.975799 | 5.382757  |
| C | 4.447825   | -3.912419 | 3.628952  |
| H | 3.504544   | -3.637005 | 4.092321  |
| C | 4.74074    | -3.528078 | 2.30106   |
| C | 5.973798   | -3.909283 | 1.727382  |
| H | 6.239712   | -3.613837 | 0.716843  |
| C | 6.890169   | -4.681452 | 2.465019  |
| H | 7.831442   | -4.976885 | 2.009707  |
| C | 6.592317   | -5.069087 | 3.785235  |
| H | 7.300647   | -5.666014 | 4.352707  |
| C | -6.004356  | -6.247363 | -2.407275 |
| H | -6.621357  | -7.086018 | -2.717183 |
| C | -5.417876  | -6.234537 | -1.128115 |
| H | -5.578725  | -7.065571 | -0.446797 |
| C | -4.612788  | -5.150351 | -0.728085 |
| H | -4.163562  | -5.179743 | 0.260539  |
| C | -4.391813  | -4.061559 | -1.600546 |
| C | -4.978439  | -4.086028 | -2.886025 |
| H | -4.801419  | -3.278847 | -3.590325 |
| C | -5.77765   | -5.171006 | -3.287451 |
| H | -6.216999  | -5.178844 | -4.281101 |

|   |           |           |           |
|---|-----------|-----------|-----------|
| C | 3.601905  | -2.104089 | -1.506678 |
| H | 2.663049  | -1.551081 | -1.600861 |
| H | 3.831583  | -2.543242 | -2.483735 |
| C | -2.930797 | -2.841594 | 0.717612  |
| H | -2.582974 | -3.855717 | 0.940842  |
| H | -2.108511 | -2.156609 | 0.944558  |
| C | 6.558733  | -1.680286 | -1.229892 |
| C | 7.731585  | -1.037747 | -0.773518 |
| H | 7.67771   | -0.070348 | -0.28307  |
| C | 8.992971  | -1.625549 | -0.974118 |
| H | 9.887059  | -1.116838 | -0.624515 |
| C | 9.099249  | -2.866715 | -1.631958 |
| H | 10.073837 | -3.320154 | -1.788829 |
| C | 7.93647   | -3.51034  | -2.09456  |
| H | 8.010484  | -4.462785 | -2.612316 |
| C | 6.673221  | -2.919429 | -1.898305 |
| H | 5.797613  | -3.437354 | -2.279574 |
| C | -3.760735 | 6.412319  | 1.423837  |
| H | -3.445777 | 6.072091  | 2.416043  |
| H | -4.85134  | 6.3078    | 1.356705  |
| H | -3.539857 | 7.484835  | 1.355685  |
| C | -4.670095 | 1.682513  | 1.93533   |
| H | -4.371546 | 1.960877  | 0.929063  |
| C | -5.139208 | 2.30535   | 4.25065   |
| H | -5.219403 | 3.064219  | 5.024637  |
| C | 3.055192  | 6.080686  | 0.993533  |
| H | 3.7117    | 6.904698  | 1.260103  |
| C | 0.117544  | 2.872969  | 4.883361  |
| H | 0.192771  | 3.009455  | 5.958871  |
| C | 3.471883  | -3.196768 | -0.422609 |
| H | 4.275968  | -3.934844 | -0.497093 |
| H | 2.519214  | -3.724459 | -0.532714 |
| C | -4.742983 | 2.65986   | 2.947817  |
| H | -4.516709 | 3.696941  | 2.714866  |
| C | 0.885659  | 3.665531  | 4.022829  |
| H | 1.552762  | 4.413203  | 4.435607  |
| C | -1.612689 | 1.03262   | 5.247732  |
| H | -2.206024 | 1.645561  | 5.936606  |
| H | -0.99006  | 0.371627  | 5.865414  |
| H | -2.309986 | 0.416455  | 4.672016  |

Optimized Cartesian Coordinates of cis-2<sup>4+</sup>

| Atomic Name | X         | Y        | Z       |
|-------------|-----------|----------|---------|
| Ru          | -0.000004 | 1.760687 | 0.00056 |

|    |           |           |           |
|----|-----------|-----------|-----------|
| Fe | -3.810495 | -1.661985 | -0.461793 |
| Fe | 3.810417  | -1.662381 | 0.460795  |
| P  | 4.481773  | -1.540209 | -1.823599 |
| P  | 5.573403  | -0.076708 | 0.769916  |
| P  | -5.573756 | -0.076086 | -0.769611 |
| P  | -4.481498 | -1.541713 | 1.822604  |
| N  | 2.40086   | -0.350745 | 0.222598  |
| N  | -0.406294 | 1.941814  | 2.06889   |
| N  | -1.439562 | 3.355615  | 0.038383  |
| C  | 6.024966  | -2.410748 | -2.439218 |
| C  | 5.871542  | 0.76082   | -0.92741  |
| H  | 5.818163  | 1.843406  | -0.774842 |
| H  | 6.891844  | 0.518226  | -1.237178 |
| C  | 4.836176  | 0.316701  | -1.985331 |
| H  | 5.179053  | 0.559321  | -2.997017 |
| H  | 3.875496  | 0.814153  | -1.826373 |
| C  | -6.107397 | 2.379534  | -2.095005 |
| H  | -6.955829 | 2.467526  | -1.420159 |
| C  | 3.611234  | -3.855832 | 0.414703  |
| H  | 3.502821  | -4.456834 | -0.476919 |
| C  | 3.170918  | -2.052248 | -3.06383  |
| C  | 9.323801  | -1.927357 | 0.888276  |
| H  | 9.994263  | -2.411066 | 0.183717  |
| C  | 3.100998  | -2.649544 | 2.337481  |
| H  | 2.546289  | -2.160922 | 3.126576  |
| C  | 3.094162  | 5.985562  | 2.173122  |
| H  | 4.18312   | 6.102822  | 2.22539   |
| H  | 2.761663  | 5.499312  | 3.095218  |
| H  | 2.665104  | 6.995754  | 2.150889  |
| C  | -0.136113 | 1.170595  | -3.049429 |
| H  | -0.806054 | 0.388344  | -2.716095 |
| C  | 3.53056   | -2.262248 | -4.414687 |
| H  | 4.550058  | -2.096045 | -4.751155 |
| C  | -5.216905 | 1.284761  | -2.002501 |
| C  | -1.46926  | 0.398064  | -0.145225 |
| C  | 7.028054  | -1.714223 | -3.151329 |
| H  | 6.962154  | -0.644191 | -3.326435 |
| N  | 0.406227  | 1.942709  | -2.06773  |
| C  | -4.883887 | 3.213937  | -4.033825 |
| H  | -4.777554 | 3.938885  | -4.836355 |
| C  | -2.686542 | 5.204355  | -0.943985 |
| C  | 5.216052  | 1.283324  | 2.003578  |
| C  | -7.590138 | -0.653989 | -2.704243 |
| H  | -6.946975 | -0.1455   | -3.417184 |



|   |           |           |           |
|---|-----------|-----------|-----------|
| C | 1.603871  | 3.179022  | -3.762465 |
| H | 2.288135  | 3.973914  | -4.034598 |
| C | 2.536523  | -3.331579 | 1.200934  |
| H | 1.48335   | -3.436018 | 0.980623  |
| C | -4.527315 | -2.752525 | -2.26003  |
| H | -5.24292  | -2.369745 | -2.973881 |
| C | 2.687009  | 5.20362   | 0.946506  |
| C | 3.080732  | 5.601145  | -0.351653 |
| H | 3.70683   | 6.479325  | -0.485292 |
| C | -4.154638 | 1.168054  | -2.919954 |
| H | -3.470107 | 0.327554  | -2.853621 |
| C | -2.536332 | -3.329244 | -1.205569 |
| H | -1.482884 | -3.433126 | -0.9863   |
| C | 7.589235  | -0.655647 | 2.704772  |
| H | 6.945839  | -0.147638 | 3.417843  |
| C | 2.575827  | -2.735089 | -5.333474 |
| H | 2.863572  | -2.909489 | -6.366339 |
| C | 4.154075  | 1.165411  | 2.921198  |
| H | 3.469951  | 0.324601  | 2.854443  |
| C | -3.102305 | -2.646117 | -2.340697 |
| H | -2.548659 | -2.156227 | -3.129748 |
| C | 1.279264  | 2.949231  | -2.410711 |
| C | 1.469198  | 0.397888  | 0.145647  |
| N | -2.4009   | -0.350539 | -0.222737 |
| C | -1.87309  | 4.057919  | -1.040562 |
| H | -1.555493 | 3.695179  | -2.010417 |
| C | 0.138063  | 1.348667  | -4.417934 |
| C | 8.814675  | -1.183443 | 3.150499  |
| H | 9.091492  | -1.089367 | 4.196676  |
| C | -4.852631 | -3.464989 | -1.048157 |
| H | -5.848248 | -3.734554 | -0.727095 |
| C | -3.991202 | 2.130334  | -3.935252 |
| H | -3.190025 | 2.021918  | -4.661532 |
| C | 0.135513  | 1.168863  | 3.050244  |
| H | 0.805089  | 0.386447  | 2.716569  |
| C | 8.138739  | -2.405859 | -3.671829 |
| H | 8.900479  | -1.861971 | -4.223208 |
| C | 4.853075  | -3.465528 | 1.045494  |
| H | 5.849141  | -3.733997 | 0.724907  |
| C | 7.252893  | -4.497421 | -2.792546 |
| H | 7.330295  | -5.573205 | -2.663774 |
| C | -8.815679 | -1.181553 | -3.149963 |
| H | -9.092791 | -1.086829 | -4.196004 |
| C | 1.033855  | 2.385847  | -4.764658 |

|   |            |           |           |
|---|------------|-----------|-----------|
| H | 1.278743   | 2.569951  | -5.807281 |
| C | 6.143657   | -3.809193 | -2.270428 |
| H | 5.369307   | -4.379041 | -1.765273 |
| C | -8.097546  | -1.406648 | -0.435531 |
| H | -7.84553   | -1.513653 | 0.61462   |
| C | -1.27898   | 2.948488  | 2.412318  |
| C | -1.034253  | 2.383613  | 4.765975  |
| H | -1.279281  | 2.567164  | 5.808665  |
| C | -9.686659  | -1.817548 | -2.244296 |
| H | -10.635933 | -2.216688 | -2.589513 |
| N | 1.43982    | 3.35541   | -0.036592 |
| C | 1.873324   | 4.057314  | 1.042623  |
| H | 1.555493   | 3.694358  | 2.012322  |
| C | -9.324128  | -1.926913 | -0.888071 |
| H | -9.994356  | -2.411109 | -0.183625 |
| C | -5.937195  | 3.342016  | -3.105859 |
| H | -6.641462  | 4.165098  | -3.188804 |
| C | -2.574545  | -2.736402 | 5.331959  |
| H | -2.861906  | -2.910297 | 6.365017  |
| C | -3.09403   | 5.986544  | -2.170332 |
| H | -2.667399  | 6.997715  | -2.146651 |
| H | -4.183215  | 6.101255  | -2.223773 |
| H | -2.759344  | 5.501929  | -3.092503 |
| C | -7.027455  | -1.717775 | 3.150668  |
| H | -6.961966  | -0.647851 | 3.326614  |
| C | -1.262641  | -3.01958  | 4.904583  |
| H | -0.53968   | -3.423166 | 5.608561  |
| C | -3.529427  | -2.263257 | 4.413476  |
| H | -4.548673  | -2.096339 | 4.750369  |
| C | -8.137743  | -2.410314 | 3.670809  |
| H | -8.899613  | -1.867214 | 4.222788  |
| C | 1.851579   | -2.318558 | -2.640368 |
| H | 1.570029   | -2.161254 | -1.603384 |
| C | -3.170311  | -2.053947 | 3.062384  |
| C | -6.02423   | -2.413302 | 2.437777  |
| C | 1.263507   | -3.017217 | -4.90667  |
| H | 0.540634   | -3.420567 | -5.610871 |
| C | -5.871714  | 0.76004   | 0.928404  |
| H | -5.818359  | 1.842768  | 0.776774  |
| H | -6.892004  | 0.517202  | 1.238012  |
| C | 8.25659    | -3.796981 | -3.490847 |
| H | 9.111198   | -4.329598 | -3.897791 |
| C | -1.603712  | 3.177643  | 3.764156  |
| H | -2.287735  | 3.972632  | 4.036613  |

|   |           |           |           |
|---|-----------|-----------|-----------|
| C | 0.905152  | -2.804241 | -3.561784 |
| H | -0.100416 | -3.047923 | -3.227295 |
| C | -3.079857 | 5.601667  | 0.354362  |
| H | -3.705677 | 6.479992  | 0.488364  |
| C | 1.819562  | 3.749519  | -1.294609 |
| C | -0.90483  | -2.807359 | 3.559432  |
| H | 0.100334  | -3.052048 | 3.224469  |
| C | 5.935632  | 3.340078  | 3.108304  |
| H | 6.639535  | 4.16342   | 3.191732  |
| C | -1.851375 | -2.321323 | 2.638334  |
| H | -1.570265 | -2.164589 | 1.601143  |
| C | -4.836317 | 0.315024  | 1.985877  |
| H | -5.179174 | 0.556708  | 2.9978    |
| H | -3.875679 | 0.812709  | 1.827371  |
| C | 9.685939  | -1.818826 | 2.244677  |
| H | 10.635137 | -2.218133 | 2.58991   |
| C | -7.251176 | -4.500784 | 2.789632  |
| H | -7.328145 | -5.576496 | 2.659997  |
| C | 4.882593  | 3.210808  | 4.036423  |
| H | 4.776147  | 3.935088  | 4.839542  |
| C | 8.097321  | -1.406871 | 0.435723  |
| H | 7.845593  | -1.51318  | -0.614573 |
| C | -8.255032 | -3.80134  | 3.488701  |
| H | -9.109333 | -4.334654 | 3.895377  |
| C | 3.990401  | 2.126865  | 3.937254  |
| H | 3.189455  | 2.017478  | 4.66364   |
| C | -3.609973 | -3.855229 | -0.418971 |
| H | -3.500378 | -4.457383 | 0.471737  |
| C | 4.526169  | -2.754849 | 2.257989  |
| H | 5.240833  | -2.372501 | 2.973019  |
| C | -0.138857 | 1.346229  | 4.418786  |
| C | 2.652596  | 4.872415  | -1.468039 |
| H | 2.949081  | 5.192757  | -2.459968 |
| C | -0.492608 | 0.464678  | -5.469281 |
| H | -1.282471 | -0.168322 | -5.050033 |
| H | 0.25595   | -0.197839 | -5.92178  |
| H | -0.926772 | 1.05915   | -6.282202 |
| C | -6.142335 | -3.811653 | 2.267863  |
| H | -5.367796 | -4.380727 | 1.7621    |
| C | -1.819034 | 3.749432  | 1.296575  |
| C | 6.106065  | 2.37844   | 2.096695  |
| H | 6.954343  | 2.467305  | 1.421774  |
| C | -7.228054 | -0.757491 | -1.340446 |
| C | 0.491358  | 0.4615    | 5.469784  |

|   |           |           |          |
|---|-----------|-----------|----------|
| H | -0.258546 | -0.19684  | 5.926082 |
| H | 0.930754  | 1.055692  | 6.280144 |
| H | 1.277084  | -0.175705 | 5.049181 |
| C | 7.227544  | -0.75833  | 1.340815 |
| C | -2.651709 | 4.87252   | 1.47047  |
| H | -2.947922 | 5.192678  | 2.462541 |

**Optimized Cartesian Coordinates of trans-2<sup>3+</sup>**

| Atomic Name | X         | Y         | Z         |
|-------------|-----------|-----------|-----------|
| Ru          | -0.045133 | -0.074363 | 0.032017  |
| Fe          | 4.990657  | -0.188634 | -1.224227 |
| P           | 5.759498  | 1.696389  | -0.068268 |
| P           | 5.705943  | -1.388213 | 0.652063  |
| N           | 3.176773  | -0.068108 | -0.520245 |
| C           | 2.013294  | -0.04659  | -0.282513 |
| N           | -0.14716  | -1.330074 | -1.670894 |
| C           | -0.627619 | -0.747777 | -2.814532 |
| C           | 7.516808  | -1.874355 | 0.852374  |
| C           | 4.695852  | 3.245479  | -0.00402  |
| C           | 4.840006  | -2.98558  | 1.153077  |
| C           | -0.77277  | -1.498511 | -3.997905 |
| H           | -1.158031 | -1.034911 | -4.898363 |
| C           | 0.295305  | -2.615466 | -1.726946 |
| H           | 0.764077  | -2.999101 | -0.831088 |
| C           | 4.48907   | 0.266988  | -3.312967 |
| H           | 3.73925   | 0.96997   | -3.648158 |
| C           | 7.440123  | 2.379508  | -0.587248 |
| C           | 0.204959  | -3.420258 | -2.876562 |
| C           | 6.017731  | 1.20179   | 1.77231   |
| H           | 7.096496  | 1.184257  | 1.955064  |
| H           | 5.585271  | 1.977097  | 2.413062  |
| C           | 5.377075  | -0.171056 | 2.077345  |
| H           | 4.286398  | -0.084514 | 2.13094   |
| H           | 5.731283  | -0.568205 | 3.035652  |
| C           | 4.964962  | 4.283134  | 0.917097  |
| H           | 5.771993  | 4.18412   | 1.639485  |
| C           | 8.281105  | -1.518566 | 1.984965  |
| H           | 7.85611   | -0.91818  | 2.784681  |
| C           | 8.596188  | 1.590678  | -0.390849 |
| H           | 8.5328    | 0.612515  | 0.078471  |
| C           | 8.114252  | -2.667695 | -0.153194 |
| H           | 7.543262  | -2.971234 | -1.02604  |
| C           | 3.679295  | 3.421359  | -0.963946 |
| H           | 3.472981  | 2.626283  | -1.674667 |

|   |           |           |           |
|---|-----------|-----------|-----------|
| C | 5.880161  | 0.546679  | -3.108996 |
| H | 6.358081  | 1.510918  | -3.21545  |
| C | 4.291022  | -1.147088 | -3.079311 |
| H | 3.351579  | -1.676587 | -3.161593 |
| C | 5.546008  | -1.717555 | -2.710632 |
| H | 5.724948  | -2.762845 | -2.498019 |
| C | 9.448093  | -3.094742 | -0.029809 |
| H | 9.892024  | -3.709793 | -0.807906 |
| C | 5.216882  | -3.682346 | 2.32251   |
| H | 5.991392  | -3.28597  | 2.974682  |
| C | 7.560241  | 3.631097  | -1.228968 |
| H | 6.687764  | 4.255953  | -1.396026 |
| C | -0.376494 | -2.839304 | -4.025673 |
| H | -0.480317 | -3.419442 | -4.938645 |
| C | 9.619749  | -1.940058 | 2.105376  |
| H | 10.196457 | -1.657494 | 2.982082  |
| C | 6.537085  | -0.662184 | -2.701226 |
| H | 7.594217  | -0.772865 | -2.509931 |
| C | 4.229449  | 5.481843  | 0.875837  |
| H | 4.465148  | 6.283907  | 1.570702  |
| C | 3.871803  | -3.545421 | 0.294445  |
| H | 3.592574  | -3.012512 | -0.610831 |
| C | 0.726551  | -4.839438 | -2.884045 |
| H | 1.572219  | -4.945498 | -3.575726 |
| H | -0.046417 | -5.54361  | -3.216026 |
| H | 1.066468  | -5.15331  | -1.891774 |
| C | 3.226316  | 5.660463  | -0.098562 |
| H | 2.688515  | 6.603837  | -0.15709  |
| C | 2.953381  | 4.627622  | -1.01543  |
| H | 2.206789  | 4.77267   | -1.792049 |
| C | 9.854604  | 2.05836   | -0.810272 |
| H | 10.737159 | 1.445744  | -0.64664  |
| C | 3.301645  | -4.798161 | 0.594082  |
| H | 2.590634  | -5.250595 | -0.094266 |
| C | -0.813397 | 0.710295  | -2.747422 |
| C | -1.280317 | 1.48388   | -3.828234 |
| H | -1.628312 | 1.002324  | -4.734648 |
| C | -0.324166 | 2.664277  | -1.544243 |
| H | 0.112705  | 3.098303  | -0.6581   |
| C | -1.274438 | 2.880387  | -3.743136 |
| H | -1.634813 | 3.47992   | -4.574877 |
| C | -0.762652 | 3.50512   | -2.584817 |
| C | -0.687358 | 5.010457  | -2.461921 |
| H | -0.276121 | 5.319553  | -1.495713 |

|    |           |           |           |
|----|-----------|-----------|-----------|
| H  | -1.682251 | 5.462483  | -2.561747 |
| H  | -0.059599 | 5.441673  | -3.252195 |
| C  | 3.682242  | -5.491877 | 1.758205  |
| H  | 3.271064  | -6.476126 | 1.97064   |
| C  | 9.971705  | 3.310948  | -1.44338  |
| H  | 10.944136 | 3.670669  | -1.76803  |
| C  | 4.635032  | -4.92608  | 2.628538  |
| H  | 4.949264  | -5.465401 | 3.518271  |
| C  | 10.207164 | -2.72877  | 1.099191  |
| H  | 11.238221 | -3.057626 | 1.194688  |
| C  | 8.821126  | 4.092712  | -1.654116 |
| H  | 8.901869  | 5.059475  | -2.14389  |
| N  | -0.382928 | 1.30748   | -1.586104 |
| Fe | -5.020662 | -0.246812 | 1.215018  |
| P  | -5.87252  | -1.378595 | -0.701064 |
| P  | -5.667004 | 1.707593  | 0.027733  |
| N  | -3.232345 | -0.140409 | 0.551876  |
| C  | -2.052266 | -0.114187 | 0.338065  |
| N  | 0.350272  | 1.136158  | 1.770446  |
| C  | 0.924248  | 0.430093  | 2.801573  |
| C  | -7.459587 | 2.263297  | -0.019674 |
| C  | -4.857828 | -2.829091 | -1.305492 |
| C  | -4.739432 | 3.274441  | 0.469332  |
| C  | 1.500378  | 1.095508  | 3.900822  |
| H  | 1.968523  | 0.529721  | 4.697772  |
| C  | 0.267307  | 2.487274  | 1.884471  |
| H  | -0.265828 | 3.003266  | 1.099781  |
| C  | -4.686158 | -1.563122 | 2.989688  |
| H  | -3.940262 | -2.343504 | 3.051266  |
| C  | -7.611154 | -2.077138 | -0.560319 |
| C  | 0.815667  | 3.223818  | 2.951257  |
| C  | -5.921254 | -0.107993 | -2.133459 |
| H  | -6.971618 | 0.045808  | -2.39651  |
| H  | -5.423326 | -0.559117 | -2.997358 |
| C  | -5.229965 | 1.218662  | -1.75071  |
| H  | -4.141723 | 1.110987  | -1.763417 |
| H  | -5.497444 | 2.01857   | -2.449934 |
| C  | -5.120306 | -3.373478 | -2.583626 |
| H  | -5.868046 | -2.929103 | -3.236645 |
| C  | -8.140825 | 2.472529  | -1.239683 |
| H  | -7.662449 | 2.280971  | -2.195924 |
| C  | -8.730484 | -1.214711 | -0.568206 |
| H  | -8.615235 | -0.14057  | -0.678805 |
| C  | -8.117103 | 2.55964   | 1.195911  |

|   |            |           |           |
|---|------------|-----------|-----------|
| H | -7.604928  | 2.448118  | 2.147329  |
| C | -3.918075  | -3.451392 | -0.46015  |
| H | -3.707641  | -3.035505 | 0.520567  |
| C | -6.034812  | -1.717316 | 2.53046   |
| H | -6.497164  | -2.633688 | 2.191267  |
| C | -4.499313  | -0.18939  | 3.376653  |
| H | -3.586477  | 0.238564  | 3.767173  |
| C | -5.728743  | 0.51008   | 3.150165  |
| H | -5.912705  | 1.548066  | 3.387983  |
| C | -9.436408  | 3.04502   | 1.192325  |
| H | -9.928381  | 3.277385  | 2.132565  |
| C | -5.140715  | 4.506542  | -0.095377 |
| H | -5.966918  | 4.552688  | -0.800059 |
| C | -7.803414  | -3.467923 | -0.396966 |
| H | -6.959619  | -4.151965 | -0.397448 |
| C | 1.465293   | 2.492185  | 3.969342  |
| H | 1.920279   | 3.009393  | 4.809754  |
| C | -9.463073  | 2.95703   | -1.241032 |
| H | -9.97476   | 3.11994   | -2.185455 |
| C | -6.677945  | -0.428012 | 2.591025  |
| H | -7.710892  | -0.228461 | 2.34618   |
| C | -4.448234  | -4.533109 | -3.008647 |
| H | -4.667797  | -4.955417 | -3.985213 |
| C | -3.697236  | 3.243412  | 1.418342  |
| H | -3.383996  | 2.300862  | 1.856584  |
| C | 0.734828   | 4.732934  | 2.985782  |
| H | 0.364921   | 5.092985  | 3.953587  |
| H | 1.728449   | 5.172963  | 2.832604  |
| H | 0.080865   | 5.124021  | 2.199178  |
| C | -3.521441  | -5.163931 | -2.155222 |
| H | -3.028906  | -6.079655 | -2.471471 |
| C | -3.257609  | -4.620175 | -0.884445 |
| H | -2.558224  | -5.118775 | -0.21826  |
| C | -10.027698 | -1.742346 | -0.434268 |
| H | -10.883881 | -1.073897 | -0.45377  |
| C | -3.06936   | 4.441003  | 1.809231  |
| H | -2.295593  | 4.417757  | 2.571621  |
| C | 0.790831   | -1.03245  | 2.716915  |
| C | 1.122613   | -1.912749 | 3.765793  |
| H | 1.616184   | -1.543176 | 4.656773  |
| C | -0.185016  | -2.805588 | 1.520694  |
| H | -0.73472   | -3.105049 | 0.637532  |
| C | 0.795624   | -3.268211 | 3.667136  |
| H | 1.059988   | -3.952302 | 4.468715  |

|   |            |           |           |
|---|------------|-----------|-----------|
| C | 0.094313   | -3.738763 | 2.533906  |
| C | -0.323734  | -5.186063 | 2.408733  |
| H | -0.883232  | -5.37106  | 1.485239  |
| H | 0.555273   | -5.84259  | 2.404159  |
| H | -0.95134   | -5.496801 | 3.253315  |
| C | -3.466466  | 5.668228  | 1.245553  |
| H | -2.996226  | 6.594983  | 1.563444  |
| C | -10.218542 | -3.12886  | -0.277984 |
| H | -11.22134  | -3.533858 | -0.176947 |
| C | -4.497366  | 5.697711  | 0.285466  |
| H | -4.817561  | 6.643459  | -0.142667 |
| C | -10.115479 | 3.240727  | -0.026672 |
| H | -11.133444 | 3.619589  | -0.029557 |
| C | -9.103687  | -3.988176 | -0.257921 |
| H | -9.243782  | -5.059296 | -0.142824 |
| N | 0.190563   | -1.498928 | 1.576796  |

**Optimized Cartesian Coordinates of trans-2<sup>4+</sup>**

| Atomic Name | X         | Y         | Z         |
|-------------|-----------|-----------|-----------|
| Ru          | 0.005754  | -0.054618 | -0.428331 |
| Fe          | 5.123864  | -0.584625 | -0.885885 |
| Fe          | -5.10057  | 0.606856  | -0.881255 |
| P           | 5.757661  | 1.585724  | -0.125596 |
| P           | 5.735554  | -1.252344 | 1.329583  |
| P           | -5.593496 | 1.361008  | 1.331331  |
| P           | -5.916167 | -1.491403 | -0.063336 |
| N           | -0.331927 | -1.080552 | 1.414327  |
| C           | 2.057806  | -0.218882 | -0.431591 |
| N           | 3.247821  | -0.306102 | -0.479961 |
| N           | -3.23369  | 0.248092  | -0.490227 |
| C           | -2.046265 | 0.125369  | -0.455073 |
| C           | -4.99592  | 0.709027  | -3.11644  |
| H           | -4.325917 | 0.131891  | -3.738927 |
| N           | 0.112661  | -1.62384  | -1.882622 |
| C           | 4.855598  | -1.039553 | -3.048575 |
| H           | 4.014616  | -0.707743 | -3.641521 |
| N           | -0.111254 | 1.0052    | -2.292304 |
| C           | 7.43075   | -2.02918  | 1.540825  |
| C           | -6.857224 | 1.368539  | -1.888671 |
| H           | -7.853163 | 1.386387  | -1.470723 |
| C           | -6.319394 | 0.326554  | -2.728275 |
| H           | -6.831697 | -0.58502  | -3.002472 |
| N           | 0.34415   | 1.470538  | 1.032587  |
| C           | 4.943912  | -2.284467 | -2.329434 |



|   |           |           |           |
|---|-----------|-----------|-----------|
| H | 4.182688  | -3.051708 | -2.296276 |
| C | 7.562364  | 2.087862  | -0.03803  |
| C | -5.87522  | 2.430152  | -1.81874  |
| H | -5.992267 | 3.385223  | -1.326921 |
| C | 5.138608  | 1.53845   | 1.66631   |
| H | 5.382124  | 2.474166  | 2.181597  |
| H | 4.049012  | 1.465415  | 1.598207  |
| C | 6.223813  | -2.340452 | -1.689752 |
| H | 6.610628  | -3.154708 | -1.093025 |
| C | 9.66869   | 2.52755   | -1.203238 |
| H | 10.249019 | 2.532791  | -2.121426 |
| C | 6.917126  | -1.107033 | -1.972282 |
| H | 7.922809  | -0.865874 | -1.660369 |
| C | 8.3332    | 2.089048  | -1.223397 |
| H | 7.899547  | 1.785277  | -2.171843 |
| C | 7.550519  | -3.420893 | 1.758391  |
| H | 6.670485  | -4.051399 | 1.847367  |
| C | 0.07832   | -1.221869 | -3.194605 |
| C | 6.076709  | -0.319851 | -2.849149 |
| H | 6.328675  | 0.627036  | -3.304732 |
| C | 5.728607  | 0.324556  | 2.414543  |
| H | 5.141627  | 0.110955  | 3.313211  |
| H | 6.760611  | 0.506243  | 2.726883  |
| C | 8.824378  | -4.004359 | 1.892176  |
| H | 8.909893  | -5.072357 | 2.071118  |
| C | -4.723643 | 2.009273  | -2.558322 |
| H | -3.807445 | 2.570215  | -2.678594 |
| C | -0.12564  | 0.218244  | -3.417478 |
| C | 9.863942  | -1.823238 | 1.582407  |
| H | 10.754599 | -1.204496 | 1.519853  |
| C | 9.98288   | -3.208919 | 1.806534  |
| H | 10.964129 | -3.661217 | 1.917035  |
| C | -0.827199 | -2.342819 | 1.527405  |
| H | -1.004352 | -2.876276 | 0.603564  |
| C | 4.566742  | -2.469152 | 2.137518  |
| C | -7.680602 | -1.942597 | -0.516437 |
| C | 3.89403   | 2.802589  | -1.92914  |
| H | 3.540012  | 1.794803  | -2.12299  |
| C | 4.933025  | 3.025146  | -1.000878 |
| C | 0.613317  | -3.907903 | -2.593719 |
| C | 0.405559  | -2.924813 | -1.608897 |
| H | 0.50424   | -3.184314 | -0.563869 |
| C | 8.594815  | -1.233015 | 1.442622  |
| H | 8.535443  | -0.162948 | 1.265046  |

|   |            |           |           |
|---|------------|-----------|-----------|
| C | -5.107903  | -0.161879 | 2.351117  |
| H | -4.027137  | -0.271015 | 2.219232  |
| H | -5.300097  | 0.013139  | 3.415514  |
| C | -1.153969  | -2.950089 | 2.753667  |
| C | 0.215381   | 1.074788  | 2.340327  |
| C | -10.08542  | -1.600838 | -0.262458 |
| H | -10.915208 | -1.094856 | 0.222773  |
| C | -0.976544  | -2.174103 | 3.921144  |
| H | -1.209948  | -2.59157  | 4.896876  |
| C | 3.688701   | -3.249196 | 1.358784  |
| H | 3.620956   | -3.088147 | 0.286919  |
| C | -5.857101  | -1.413363 | 1.848584  |
| H | -6.890125  | -1.435632 | 2.206126  |
| H | -5.362626  | -2.322434 | 2.204649  |
| C | -0.213904  | -0.316539 | 2.548451  |
| C | 4.649221   | -2.687467 | 3.532108  |
| H | 5.348592   | -2.124696 | 4.146098  |
| C | -8.765054  | -1.275484 | 0.097655  |
| H | -8.605111  | -0.511524 | 0.853225  |
| C | -0.602627  | 2.971124  | -3.661925 |
| C | 10.250508  | 2.970431  | 0.001463  |
| H | 11.281125  | 3.312838  | 0.015929  |
| C | -7.352719  | 1.778125  | 1.829512  |
| C | -0.348812  | 0.782902  | -4.690525 |
| H | -0.358427  | 0.156151  | -5.574536 |
| C | 8.146567   | 2.544452  | 1.165382  |
| H | 7.58155    | 2.585327  | 2.092176  |
| C | 3.328245   | 3.889491  | -2.622775 |
| H | 2.552335   | 3.710685  | -3.363092 |
| C | 0.84445    | 2.709837  | 0.773438  |
| H | 1.032058   | 2.948088  | -0.264548 |
| C | 2.907629   | -4.249485 | 1.968466  |
| H | 2.257818   | -4.875049 | 1.360854  |
| C | -0.371808  | 2.335055  | -2.427956 |
| H | -0.421345  | 2.910196  | -1.513862 |
| C | -7.930001  | -2.919618 | -1.507418 |
| H | -7.113393  | -3.45148  | -1.987384 |
| C | -10.333944 | -2.580042 | -1.244115 |
| H | -11.354547 | -2.831111 | -1.517896 |
| C | -7.977993  | 1.155059  | 2.933413  |
| H | -7.475627  | 0.384631  | 3.511281  |
| C | -8.036987  | 2.804072  | 1.137762  |
| H | -7.565017  | 3.333294  | 0.314828  |
| C | 0.273222   | -2.14991  | -4.238492 |

|   |           |           |           |
|---|-----------|-----------|-----------|
| H | 0.243895  | -1.827189 | -5.272603 |
| C | -4.594744 | 2.825938  | 1.938306  |
| C | -1.664573 | -4.372316 | 2.807631  |
| H | -2.009312 | -4.719419 | 1.82773   |
| H | -2.495629 | -4.472292 | 3.51529   |
| H | -0.876536 | -5.057412 | 3.148525  |
| C | 0.916145  | -5.341506 | -2.219419 |
| H | 1.845641  | -5.689765 | -2.686766 |
| H | 0.12181   | -6.015312 | -2.565292 |
| H | 1.011879  | -5.47033  | -1.135918 |
| C | -3.494508 | 3.305245  | 1.196657  |
| H | -3.196266 | 2.809154  | 0.278119  |
| C | 0.525797  | -3.493902 | -3.942952 |
| H | 0.674559  | -4.209773 | -4.747035 |
| C | -3.349446 | -4.102303 | -2.067853 |
| H | -2.675032 | -4.057454 | -2.919124 |
| C | -0.573936 | 2.157481  | -4.818409 |
| H | -0.742221 | 2.593417  | -5.799551 |
| C | -4.981958 | 3.484199  | 3.128007  |
| H | -5.846917 | 3.149007  | 3.693621  |
| C | -0.525118 | -0.854408 | 3.813122  |
| H | -0.427854 | -0.24762  | 4.705494  |
| C | -3.173193 | 5.093178  | 2.829181  |
| H | -2.64268  | 5.980917  | 3.162766  |
| C | -9.329156 | 3.190547  | 1.534162  |
| H | -9.841876 | 3.986291  | 1.001425  |
| C | -9.253911 | -3.23569  | -1.865544 |
| H | -9.4397   | -3.995475 | -2.619321 |
| C | -5.159148 | -4.227822 | 0.084081  |
| H | -5.889118 | -4.30393  | 0.886784  |
| C | 1.167361  | 3.649856  | 1.768973  |
| C | -2.789282 | 4.438192  | 1.643541  |
| H | -1.958226 | 4.823541  | 1.057631  |
| C | -3.593201 | -5.331368 | -1.426    |
| H | -3.110454 | -6.239486 | -1.777278 |
| C | -0.870073 | 4.457724  | -3.741386 |
| H | -0.892854 | 4.924416  | -2.750895 |
| H | -1.827246 | 4.665427  | -4.236197 |
| H | -0.098353 | 4.966378  | -4.333304 |
| C | 0.517812  | 1.961653  | 3.393102  |
| H | 0.407784  | 1.64605   | 4.42375   |
| C | -4.916228 | -2.992983 | -0.561792 |
| C | 5.40043   | 4.339525  | -0.771119 |
| H | 6.225983  | 4.524884  | -0.089314 |

|   |            |           |           |
|---|------------|-----------|-----------|
| C | -4.266812  | 4.610232  | 3.573769  |
| H | -4.575414  | 5.118141  | 4.482962  |
| C | 2.991956   | -4.468246 | 3.35646   |
| H | 2.4106     | -5.258718 | 3.823569  |
| C | 9.485141   | 2.981444  | 1.182792  |
| H | 9.922419   | 3.33688   | 2.111515  |
| C | 1.692845   | 5.020603  | 1.406688  |
| H | 2.014733   | 5.07149   | 0.361423  |
| H | 2.545511   | 5.299546  | 2.036493  |
| H | 0.923654   | 5.789728  | 1.560213  |
| C | 3.858746   | -3.679623 | 4.139038  |
| H | 3.942332   | -3.855227 | 5.207774  |
| C | 3.791395   | 5.199347  | -2.391568 |
| H | 3.373588   | 6.03547   | -2.945778 |
| C | -9.953719  | 2.55704   | 2.627103  |
| H | -10.950384 | 2.858666  | 2.935812  |
| C | 4.82479    | 5.422545  | -1.460313 |
| H | 5.198617   | 6.428276  | -1.290696 |
| C | 0.975323   | 3.252929  | 3.111712  |
| H | 1.202514   | 3.939042  | 3.923165  |
| C | -4.006073  | -2.933569 | -1.635705 |
| H | -3.815944  | -1.991056 | -2.139847 |
| C | -4.494689  | -5.391103 | -0.343824 |
| H | -4.704651  | -6.340466 | 0.140832  |
| C | -9.273208  | 1.543004  | 3.327097  |
| H | -9.741444  | 1.062946  | 4.181712  |
